# Supplementary material
Source: MDPI journal article supplement (https://www.mdpi.com/1999-4907/9/3/98)
Supplement: s1 [file s1]

## Supplementary Materials

Table S1: Bio-physical factors considered in the construction of synthetic controls, due to established relationship with deforestation

| Variable           | Description                                                                                         | Units                                    | Spatial resolution | Time frame                            | Source                                                                                                                                                                                    | Rationale                                                                                                                                                                                                                         |
|--------------------|-----------------------------------------------------------------------------------------------------|------------------------------------------|--------------------|---------------------------------------|-------------------------------------------------------------------------------------------------------------------------------------------------------------------------------------------|-----------------------------------------------------------------------------------------------------------------------------------------------------------------------------------------------------------------------------------|
| Tree cover 2000    | Tree cover in FMU                                                                                   | Hectares                                 | 30 m               | 2000                                  | [1] <a href="http://www.earthenginepartners.appspot.com/science-2013-global-forest/download.html">http://www.earthenginepartners.appspot.com/science-2013-global-forest/download.html</a> | Higher initial tree cover may be associated with greater timber stocks, potentially leading to greater legal and illegal logging, which can result in temporary deforestation or provide access for agents of deforestation [2,3] |
| Altitude           | Mean elevation from sea level                                                                       | Meter                                    | 1 km               | Representative of 1950-2000 (Average) | SRTM elevation database ( <a href="http://www2.jpl.nasa.gov/srtm/">http://www2.jpl.nasa.gov/srtm/</a> )                                                                                   | Higher elevations typically have more varied topography, which increases difficulty of both deforestation and monitoring.                                                                                                         |
| <b>Climate</b>     |                                                                                                     |                                          |                    |                                       |                                                                                                                                                                                           |                                                                                                                                                                                                                                   |
| Mean temperature   | Annual mean temperature                                                                             | Centigrade                               | 1 km               | Representative of 1950-2000 (Average) | WorldClim (Global Climate Data portal) - <a href="http://www.worldclim.org/current">http://www.worldclim.org/current</a>                                                                  | Higher temperature may be associated with higher probability of wildfire damage, resulting in higher chances of deforestation [4].                                                                                                |
| Mean precipitation | Mean annual precipitation                                                                           | Cm                                       | 1 km               | Representative of 1950-2000 (Average) | WorldClim (Global Climate Data portal) - <a href="http://www.worldclim.org/current">http://www.worldclim.org/current</a>                                                                  | Areas with higher precipitation are less likely to be profitable for agriculture, possibly leading to less deforestation [5].                                                                                                     |
| <b>FMU</b>         |                                                                                                     |                                          |                    |                                       |                                                                                                                                                                                           |                                                                                                                                                                                                                                   |
| Area               | Area of the FMU (Based on official shape file.)                                                     | km <sup>2</sup>                          | Polygon            | 2004                                  | FMU shape files (source varies by country)                                                                                                                                                | The larger a FMU, the harder to monitor and to prevent illegal activity.                                                                                                                                                          |
| Monitoring cost    | Shape of FMU, indexed by the perimeter of the FMU divided by perimeter of a circle of the same area | 1 = perfectly compact<br>>1 = fragmented | Polygon            | 2004                                  | FMU shape files (source varies by country)                                                                                                                                                | The shape of a FMU affects the cost of monitoring and supervision, thereby influencing the probability of deforestation.                                                                                                          |

Table S2. Description of covariates in case of Estuário

| Variable                                             | Description                             | Units  | Spatial unit   | Year | Source                                                                                                                                                                                                          | Plausible causal mechanism                                                                                                                                                                                               |
|------------------------------------------------------|-----------------------------------------|--------|----------------|------|-----------------------------------------------------------------------------------------------------------------------------------------------------------------------------------------------------------------|--------------------------------------------------------------------------------------------------------------------------------------------------------------------------------------------------------------------------|
| Distance from settlement                             | Distance from closest settlement        | Km     | Point          | 2000 | Global rural-urban mapping project (GRUMP), v1 (2000) - <a href="http://sedac.ciesin.columbia.edu/data/set/grump-v1-settlement-points">http://sedac.ciesin.columbia.edu/data/set/grump-v1-settlement-points</a> | Von Thunen theory and a large body of empirical evidence suggest higher probability of deforestation closer to settlements.                                                                                              |
| Distance from timber pole, or wood processing center | Distance from closest "Polo madeireiro" | Km     | Point          | 2004 | Location of polos madeireiros from [6] <a href="http://amazon.org.br/publicacoes/fatos-florestais-da-amazonia-2010/">http://amazon.org.br/publicacoes/fatos-florestais-da-amazonia-2010/</a>                    | Better access to wood processing centers is likely to encourage both legal and illegal logging, which can result in temporary deforestation, finance deforestation, or provide access for agents of deforestation [2,3]. |
| Distance from protected area                         | Distance from closest protected area    | Km     | Polygon        | 2014 | UNEP-WCMC, UNEP, and IUCN. "World Database on Protected Areas." Accessed in April, 2014. <a href="http://www.protectedplanet.net">www.protectedplanet.net</a> .                                                 | Spill-over of monitoring and supervision from protected areas may decrease the probability of deforestation in nearby FMUs.                                                                                              |
| Poverty count                                        | Poverty count                           | Number | 1 Km (approx.) | 2004 | Global poverty estimates. National Geophysical Data Center (NGDC) data products <a href="http://www.ngdc.noaa.gov/eog/dmsp.html">http://www.ngdc.noaa.gov/eog/dmsp.html</a>                                     | Poverty may affect relations between FMUs and local communities, and may drive deforestation, depending on the context [7].                                                                                              |

Table S3: Descriptive statistics for FMUs in the Estuário Landscape

Table S3 (a): Descriptive statistics for non-certified FMUs in the Estuário Landscape (Donor pool)

(i) Deforestation

|                                                      | N  | Mean | SD   | Median | Minimum | Maximum | Range |
|------------------------------------------------------|----|------|------|--------|---------|---------|-------|
| Annual percent deforestation (2001 to 2012, average) | 44 | 0.25 | 1.16 | 0.01   | 0       | 18.09   | 18.09 |

(ii) Covariates

| Covariates | N | Mean | SD | Median | Minimum | Maximum | Range |
|------------|---|------|----|--------|---------|---------|-------|
|------------|---|------|----|--------|---------|---------|-------|

|                              |    |         |          |         |        |          |          |
|------------------------------|----|---------|----------|---------|--------|----------|----------|
| Tree cover 2000              | 44 | 6788.91 | 15600.71 | 2260.71 | 74.88  | 66671.64 | 66596.76 |
| Altitude                     | 44 | 39.21   | 16.52    | 34.95   | 9.51   | 78.11    | 68.6     |
| Mean temperature             | 44 | 26.64   | 0.66     | 26.74   | 22.72  | 27.09    | 4.37     |
| Mean precipitation           | 44 | 250.79  | 17.45    | 249.66  | 216.01 | 302.51   | 86.5     |
| Area of FMU                  | 44 | 73.76   | 170.74   | 24.37   | 0.93   | 716.91   | 715.98   |
| Monitoring cost              | 44 | 1.45    | 0.4      | 1.32    | 1.11   | 3.11     | 1.99     |
| Poverty count                | 44 | 118.38  | 285.88   | 25.21   | 0      | 1725.96  | 1725.96  |
| Distance from settlement     | 44 | 77.28   | 31.93    | 77.17   | 8.06   | 134.41   | 126.36   |
| Distance from timber pole    | 44 | 55.97   | 23.32    | 56.36   | 6.14   | 102.62   | 96.48    |
| Distance from protected area | 44 | 24.31   | 19.62    | 20.05   | 0      | 67.61    | 67.61    |

Table S3 (b): Description of the certified FMU: Orsa Florestal S.A.

(i) Outcome

|                                                      |                     |
|------------------------------------------------------|---------------------|
|                                                      | Orsa Florestal S.A. |
| Annual percent deforestation (2001 to 2012, average) | 0.73                |

(ii) Covariates

|                              |           |
|------------------------------|-----------|
| Tree Cover                   | 747538.78 |
| Altitude                     | 107.81    |
| Mean Temperature             | 26.64     |
| Mean precipitation           | 209.9     |
| Distance from settlement     | 31.68     |
| Distance from timber pole    | 29.26     |
| Distance from protected area | 0         |
| Poverty count                | 3179.95   |
| Area of the FMU              | 9105.08   |
| Monitoring cost              | 2.79      |

Table S4. Vectors of weights on covariates used in construction of synthetic control for Orsa Florestal S.A.

|                                        |                   |
|----------------------------------------|-------------------|
|                                        | Vector of weights |
| Percent tree cover loss (2001 to 2005) | 0.363             |
| Distance from Protected area (2004)    | 0.17              |
| Distance from Timber Pole (2004)       | 0.114             |
| Distance from Settlement (2004)        | 0.106             |
| Altitude (2001)                        | 0.09              |
| Mean Annual Temperature (2001)         | 0.078             |

|                          |       |
|--------------------------|-------|
| Monitoring effort (2004) | 0.046 |
| Poverty Count (2004)     | 0.019 |
| Tree Cover (2000)        | 0.007 |
| Area (2004)              | 0.006 |

Table S5. Description of covariates in case of Gabon

| Variable           | Description                                                                     | Measurement      | Spatial Resolution | Year      | Source                                                                                                                                                                                                                                                   | Plausible causal mechanism                                                                                                                                                                         |
|--------------------|---------------------------------------------------------------------------------|------------------|--------------------|-----------|----------------------------------------------------------------------------------------------------------------------------------------------------------------------------------------------------------------------------------------------------------|----------------------------------------------------------------------------------------------------------------------------------------------------------------------------------------------------|
| Distance from city | Euclidian distance from nearest city (km)                                       | km               | Company            | 2008      | WRI – <a href="http://www.wri.org/our-work/project/congo-basin-forests/gabon">http://www.wri.org/our-work/project/congo-basin-forests/gabon</a>                                                                                                          | Von Thunen theory and a large body of empirical evidence suggest higher probability of deforestation in FMUs closer to settlements.                                                                |
| Quota 2008         | Quotas for FMUs in 2008 (halved when a joint quota was shown in the list)       | m <sup>3</sup>   | Company            | 2008      | Statistiques SEPBG (Société d'exploitation des parcs à bois du Gabon).                                                                                                                                                                                   | Higher quotas are likely to be associated with more intensive harvest, which can result in temporary tree cover loss or provide access for agents of deforestation                                 |
| Exchange rate 2008 | Ratio of the CFA Franc (XAF) to the currency of the home country of the company | Ratio            | Company            | 2008      | Oanda - <a href="http://www.oanda.com/currency/convert/">http://www.oanda.com/currency/convert/</a>                                                                                                                                                      | Higher ratio means exports become more competitive in global market.                                                                                                                               |
| Okoume presence    | Total area in which okoume is present (Sq.Km)                                   | Sq.Km            | Company            | 2005      | [8]                                                                                                                                                                                                                                                      | Logging in areas with okoume is more profitable.                                                                                                                                                   |
| Number of villages | Number of villages within and in 10KM buffer around FMUs                        | Number           | FMU                | 2008      | WRI – <a href="http://www.wri.org/our-work/project/congo-basin-forests/gabon">http://www.wri.org/our-work/project/congo-basin-forests/gabon</a>                                                                                                          | Number of villages within and in the neighborhood of a company is likely associated with forest loss due to the higher demand for agricultural land and possibly forest products (e.g. fuelwood).. |
| Population density | Population density within the FMU (2001-2012)                                   | Inhabitants/area | FMU                | 2001-2012 | LandScan 2000-2012, <a href="http://web.ornl.gov/sci/landsan/">http://web.ornl.gov/sci/landsan/</a><br>Based on the LandScan 2006™ High Resolution Global Population Data Set copyrighted by UT-Battelle, LLC, operator of Oak Ridge National Laboratory | Population density in FMU is likely associated with forest loss due to demand for agricultural land and possibly forest products (e.g. fuelwood).                                                  |
| Road density       | Density of roads in the FMU                                                     | Km per Sq.Km     | FMU                | 2008      | WRI – <a href="http://www.wri.org/our-work/project/congo-basin-forests/gabon">http://www.wri.org/our-work/project/congo-basin-forests/gabon</a>                                                                                                          | Greater road density is likely to cause more deforestation mainly due to improved access.                                                                                                          |

|                                                                                     |                                                                       |    |     |      |                                                                                                                                                                                                 |                                                                                                                                      |
|-------------------------------------------------------------------------------------|-----------------------------------------------------------------------|----|-----|------|-------------------------------------------------------------------------------------------------------------------------------------------------------------------------------------------------|--------------------------------------------------------------------------------------------------------------------------------------|
| Maximum distance between any two spatial units under concession to the same company | Maximum of the Euclidean distances between each pair of spatial units | Km | FMU | 2005 | Shapefiles of FMUs – from “Logging.” World Resources Institute. Accessed through Global Forest Watch in April, 2014. <a href="http://www.globalforestwatch.org">www.globalforestwatch.org</a> . | The greater the distance between any two spatial units in a FMU, the greater the difficulty of monitoring and protecting the forest. |
|-------------------------------------------------------------------------------------|-----------------------------------------------------------------------|----|-----|------|-------------------------------------------------------------------------------------------------------------------------------------------------------------------------------------------------|--------------------------------------------------------------------------------------------------------------------------------------|

Table S6: Descriptive statistics for FMUs in Gabon

Table S6 (a): Descriptive statistics of non-certified FMUs in Gabon

(i) Outcome

|                                                 | N  | Mean | Standard Deviation | Median | Range |
|-------------------------------------------------|----|------|--------------------|--------|-------|
| Percent tree cover loss (2001 to 2012, average) | 21 | 0.04 | 0.06               | 0.02   | 0.26  |

(ii) Covariates

|                                             | n  | mean    | standard deviation | median   | range    |
|---------------------------------------------|----|---------|--------------------|----------|----------|
| Tree cover 2000                             | 21 | 230216  | 145901.7           | 195159.8 | 479469.3 |
| Altitude                                    | 21 | 431.3   | 155.54             | 482.83   | 577.59   |
| Mean Temperature                            | 21 | 24.4    | 0.76               | 24.16    | 2.63     |
| Mean precipitation                          | 21 | 1830.77 | 205.93             | 1776.81  | 738.89   |
| Distance from cities                        | 21 | 42.57   | 11.25              | 40.99    | 43.31    |
| Quota 2008                                  | 21 | 34296.1 | 33052.69           | 22800    | 117600   |
| Exchange rate 2008                          | 21 | 0.43    | 1.03               | 0.01     | 3.38     |
| Area with okoume (sq.km.)                   | 21 | 1896.32 | 1491.51            | 1543.25  | 5512.83  |
| Number of villages                          | 21 | 56.24   | 48.79              | 42       | 207      |
| Population Density                          | 21 | 1.49    | 1.15               | 1.07     | 4.69     |
| Road Density                                | 21 | 0.04    | 0.02               | 0.04     | 0.08     |
| Area in sq.km.                              | 21 | 2455.16 | 1554.62            | 2084.65  | 5112.61  |
| Maximum distance between units of a company | 21 | 80.26   | 119.32             | 49.18    | 407.05   |
| Shape metric                                | 21 | 1.67    | 0.25               | 1.55     | 0.74     |

Table S6 (b): Description of Rougier (Certified FMU)

(i) Outcome

|  |      |
|--|------|
|  | Mean |
|--|------|

|                                                 |      |
|-------------------------------------------------|------|
| Percent tree cover loss (2001 to 2012, average) | 0.04 |
|-------------------------------------------------|------|

(ii) Covariates

|                                             | mean      |
|---------------------------------------------|-----------|
| Tree cover 2000                             | 829633.44 |
| Altitude                                    | 489.53    |
| Mean Temperature                            | 24.04     |
| Mean precipitation                          | 1819.66   |
| Distance from cities                        | 30.99     |
| Quota 2008                                  | 158400    |
| Exchange rate 2008                          | 0.002     |
| Area with okoume (sq.km.)                   | 8867.51   |
| Number of villages                          | 167       |
| Population Density                          | 0.7       |
| Road Density                                | 0.04      |
| Area in sq.km.                              | 8867.51   |
| Maximum distance between units of a company | 391.52    |
| Shape metric                                | 1.79      |

Table S7. Vector of weights on covariates used in construction of synthetic control for Rougier

|                                                    | Vector of weights |
|----------------------------------------------------|-------------------|
| Maximum distance between units of a company (2005) | 0.238             |
| Number of villages (2008)                          | 0.181             |
| Mean Annual Temperature (2005)                     | 0.091             |
| Road Density (2008)                                | 0.086             |
| Mean Annual Precipitation (2005)                   | 0.082             |
| Percent tree cover loss (2001 to 2008)             | 0.06              |
| Area under Okoume presence (2005)                  | 0.032             |
| Shape metric (2005)                                | 0.017             |
| Population density (2001-2012)                     | 0.01              |
| Tree cover (2001-2012)                             | 0.001             |
| Timber harvest quota (2008)                        | 0.001             |
| Area (2005)                                        | 0.001             |
| Exchange rate (2008)                               | 0.042             |
| Distance from cities (2008)                        | 0.071             |
| Mean Elevation (2001)                              | 0.087             |

Table S8. Description of covariates in case of Kalimantan (Indonesia)

*Covariates*

| Variable                       | Description                            | Measurement                       | Spatial resolution              | Year      | Source                                                                                                                                                                                                                                                     | Plausible causal mechanism                                                                                                                                                                                                                                                           |
|--------------------------------|----------------------------------------|-----------------------------------|---------------------------------|-----------|------------------------------------------------------------------------------------------------------------------------------------------------------------------------------------------------------------------------------------------------------------|--------------------------------------------------------------------------------------------------------------------------------------------------------------------------------------------------------------------------------------------------------------------------------------|
| <b>Forest management</b>       |                                        |                                   | Spatial unit                    |           |                                                                                                                                                                                                                                                            |                                                                                                                                                                                                                                                                                      |
| Area Logged                    | Area logged per year                   | Hectares                          | FMU (Company forest land)       | 2007      | Forest management plans - Ministry of Forestry (MoF)                                                                                                                                                                                                       | Logging creates gaps in the canopy and increases access for deforestation agents                                                                                                                                                                                                     |
| Volume Harvested               | Volume harvested per year              | m <sup>3</sup> /yr                | FMU (Company forest land)       | 2007      | Forest management plans - Ministry of Forestry (MoF)                                                                                                                                                                                                       | Harvest of higher volume may require more roads and skid trails that increase access                                                                                                                                                                                                 |
| Logging Intensity              | Logging intensity                      | m <sup>3</sup> /ha                | FMU (Company forest land)       | 2007      | Calculated as ratio of volume of timber harvested and area in ha.                                                                                                                                                                                          | Higher logging intensity may create more gaps in the canopy and increase forest access                                                                                                                                                                                               |
| Primary Forests                | Percent of primary forests             | Percent                           | FMU (Company forest land)       | 2009      | Forest management plans - Ministry of Forestry (MoF)                                                                                                                                                                                                       | Primary forests may be subject to more regulation and better protected by governments                                                                                                                                                                                                |
| Limited Production Forest Area | Percent of limited production area     | Percent                           | FMU (Company forest land)       | 2009      | Forest management plans - Ministry of Forestry (MoF)                                                                                                                                                                                                       | Limited production areas may be subject to more regulation and better protected by governments                                                                                                                                                                                       |
| Previously logged forest       | Percent of previously logged forest    | Percent                           | FMU (Company forest land)       | 2009      | MoF website at <a href="http://appgis.dephut.go.id/appgis/iuphkhk.aspx">http://appgis.dephut.go.id/appgis/iuphkhk.aspx</a> .                                                                                                                               | Previously logged forests are less attractive for logging but possibly more accessible to deforestation agents.                                                                                                                                                                      |
| Duration of Harvest permit     | Duration of harvest permit             | Years                             | FMU (Company forest land)       | 2007      | Forest management plans - Ministry of Forestry (MoF)                                                                                                                                                                                                       | We expect fast and intensive deforestation, if a company has limited duration to harvest trees as per their harvest permits. Companies would ignore long-term management by focusing only on short-term intensive extraction of timber rather than following sustainable harvesting. |
| <b>Anthropogenic</b>           |                                        |                                   |                                 |           |                                                                                                                                                                                                                                                            |                                                                                                                                                                                                                                                                                      |
| Population density             | Population density of FMUs (2001-2012) | Population count/ Km <sup>2</sup> | Resolution of 1 Km <sup>2</sup> | 2001-2012 | LandScan 2000-2012, <a href="http://web.ornl.gov/sci/landscan/">http://web.ornl.gov/sci/landscan/</a><br>Based on the LandScan 2006™ High Resolution Global Population Data Set copyrighted by UT-Battelle, LLC, operator of Oak Ridge National Laboratory | Higher population pressure is often associated with higher rates of deforestation.                                                                                                                                                                                                   |

|                                                  |                                                                       |                     |                           |            |                                                                                                                                                        |                                                                                                                                                                                     |
|--------------------------------------------------|-----------------------------------------------------------------------|---------------------|---------------------------|------------|--------------------------------------------------------------------------------------------------------------------------------------------------------|-------------------------------------------------------------------------------------------------------------------------------------------------------------------------------------|
| Logging Road density                             | Density of logging roads in the FMUs of a company, year 2000 and 2010 | Km per Sq.Km        | FMU (Company forest land) | 2000, 2010 | [9]                                                                                                                                                    | Higher road density facilitates rapid forest loss by providing access to remotely-situated forests and, thereby, leading to intensive extraction and transport of timber resources. |
| Population Density in surrounding areas/district | Population density in surrounding areas per district                  | Number/sq .km.      | FMU (Company forest land) | 2010       | National Population Census, 2010 ( <a href="http://sp2010.bps.go.id/index.php/publikasi/index">http://sp2010.bps.go.id/index.php/publikasi/index</a> ) | Von Thunen theory and a large body of empirical evidence suggest higher probability of deforestation in FMUs closer to settlements.                                                 |
| Population Change in surrounding area/District   | Population change in surrounding areas per district                   | Percent change/Year | FMU (Company forest land) | 2010       | National Population Census, 2010 ( <a href="http://sp2010.bps.go.id/index.php/publikasi/index">http://sp2010.bps.go.id/index.php/publikasi/index</a> ) | Von Thunen theory and a large body of empirical evidence suggest higher probability of deforestation in FMUs closer to settlements.                                                 |

Table S9: Descriptive statistics for FMUs in Kalimantan (Indonesia)

Table S9 (a): Descriptive statistics of the non-certified FMUs (Donor pool)

(i) Outcome

|                                                 | n   | Mean | Standard Deviation | Median | Maximum |
|-------------------------------------------------|-----|------|--------------------|--------|---------|
| Percent tree cover loss (2001 to 2012, average) | 108 | 0.34 | 0.41               | 0.21   | 2.45    |

(ii) Covariates

|                                          | N   | Mean     | Standard Deviation | Median   | Maximum  |
|------------------------------------------|-----|----------|--------------------|----------|----------|
| Tree cover 2000                          | 108 | 61727.11 | 71274.1            | 41563.12 | 461608.8 |
| Altitude                                 | 108 | 261.64   | 150.04             | 230.55   | 783.36   |
| Mean Temperature                         | 108 | 25.35    | 0.79               | 25.43    | 4.53     |
| Mean Precipitation                       | 108 | 3054.99  | 524.76             | 3085.73  | 2543.14  |
| Area Logged/year (ha/year)               | 108 | 1397.01  | 1619.44            | 1000     | 14446.32 |
| Volume Harvested/Yr (m3/yr)              | 108 | 51924.46 | 63689.64           | 39662.5  | 622874.8 |
| Primary Forests (%)                      | 108 | 20.73    | 25.39              | 9.2      | 92       |
| Limited Production Forest Area (percent) | 108 | 63.35    | 35.49              | 75       | 100      |
| Previously Logged (%)                    | 108 | 62.92    | 25.04              | 68.4     | 95       |



|                                                                  |     |         |         |        |         |
|------------------------------------------------------------------|-----|---------|---------|--------|---------|
| Logging Intensity (m3/ha)                                        | 108 | 40.22   | 14.28   | 39.54  | 84.91   |
| Duration of Harvest Permit                                       | 108 | 25.28   | 13.8    | 15     | 35      |
| Population Density Within FMU                                    | 108 | 7.13    | 8.35    | 4      | 50      |
| Logging Road Density (2001)                                      | 108 | 1.33    | 11.3    | 0.16   | 117.53  |
| Logging Road Density (2010)                                      | 108 | 0.14    | 0.12    | 0.11   | 0.67    |
| Population Density in surrounding areas/district (Number/sq.km.) | 108 | 12      | 12.13   | 8      | 78      |
| Population Change in surrounding area/District (%/Year)          | 108 | 2.78    | 1.64    | 2.3    | 5.9     |
| Area (Sq.Km)                                                     | 108 | 713.98  | 887.49  | 491.64 | 7390.55 |
| Shape Metric                                                     | 108 | 1.89    | 0.48    | 1.78   | 2.24    |
| Population                                                       | 108 | 2106.76 | 3659.36 | 807.12 | 26757   |

Table S9 (b): Description of the certified FMU Suka Jaya Makmur

(i) Outcome

|                                                 |      |
|-------------------------------------------------|------|
|                                                 | Mean |
| Percent tree cover loss (2001 to 2012, average) | 0.11 |

(ii) Covariates

|                                                                  |          |
|------------------------------------------------------------------|----------|
|                                                                  | Mean     |
| Tree cover 2000                                                  | 171443.4 |
| Altitude                                                         | 256.14   |
| Mean Temperature                                                 | 25.56    |
| Mean Precipitation                                               | 5779.2   |
| Area Logged/year (ha/year)                                       | 3849     |
| Volume Harvested/Yr (m3/yr)                                      | 99152.63 |
| Primary Forests (%)                                              | 18.5     |
| Limited Production Forest Area (percent)                         | 21.28    |
| Previously Logged (%)                                            | 73.5     |
| Logging Intensity (m3/ha)                                        | 25.76    |
| Duration of Harvest Permit                                       | 50       |
| Population Density Within FMU                                    | 5        |
| Logging Road Density (2001)                                      | 0.3      |
| Logging Road Density (2010)                                      | 0.19     |
| Population Density in surrounding areas/district (Number/sq.km.) | 15.5     |
| Population Change in surrounding area/District (%/Year)          | 1.2      |
| Area (Sq.Km)                                                     | 1829.77  |
| Shape Metric                                                     | 2.22     |
| Population                                                       | 4031     |

Table S10: Vectors of weights on covariates used in construction of synthetic control for Suka Jaya Makmur

| Covariates                                       | Vector of weights |
|--------------------------------------------------|-------------------|
| Percent Tree Cover Loss (2001-2010)              | 0.432             |
| Mean Elevation (2001)                            | 0.264             |
| Mean Temperature (2001)                          | 0.153             |
| Area Logged/year (ha/year) (2007)                | 0.041             |
| Primary Forests (%) (2009)                       | 0.028             |
| Logging Intensity (m <sup>3</sup> /ha) (2007)    | 0.016             |
| Duration of Harvest Permit (2007)                | 0.016             |
| Mean Precipitation (2001)                        | 0.011             |
| Shape (2010)                                     | 0.011             |
| Previously Logged (%) (2009)                     | 0.011             |
| Volume Harvested/Yr (m <sup>3</sup> /yr) (2007)  | 0.007             |
| Percent of Limited Production Forest Area (2009) | 0.005             |
| Area (Sq.Km.)(2010)                              | 0.004             |
| Population density (2001-2012)                   | 0.002             |
| Density of logging roads (2010)                  | 0.001             |

## References

1. Hansen, M. C.; Potapov, P. V.; Moore, R.; Hancher, M.; Turubanova, Sa.; Tyukavina, A.; Thau, D.; Stehman, S. V.; Goetz, S. J.; Loveland, T. R. High-resolution global maps of 21st-century forest cover change. *science* **2013**, *342*, 850–853.
2. Foley, J. A.; Asner, G. P.; Costa, M. H.; Coe, M. T.; DeFries, R.; Gibbs, H. K.; Howard, E. A.; Olson, S.; Patz, J.; Ramankutty, N. Amazonia revealed: forest degradation and loss of ecosystem goods and services in the Amazon Basin. *Front. Ecol. Environ.* **2007**, *5*, 25–32.
3. Asner, G. P.; Keller, M.; Silva, J. N. Spatial and temporal dynamics of forest canopy gaps following selective logging in the eastern Amazon. *Glob. Change Biol.* **2004**, *10*, 765–783.
4. Kirilenko, A. P.; Sedjo, R. A. Climate change impacts on forestry. *Proc. Natl. Acad. Sci.* **2007**, *104*, 19697–19702.
5. Chomitz, K. M.; Thomas, T. S. Determinants of land use in Amazonia: a fine-scale spatial analysis. *Am. J. Agric. Econ.* **2003**, *85*, 1016–1028.
6. Pereira Fatos Florestais da Amazonia 2010.
7. Atmadja, S. S.; Sills, E. O. What Is a “Community Perception” of REDD+? A Systematic Review of How Perceptions of REDD+ Have Been Elicited and Reported in the Literature. *PloS One* **2016**, *11*, e0155636.
8. Brunck, F.; Grison, F.; Maître, H.-F. *L’okoumé# Aucoumea klaineana# Pierre: monographie*; CIRAD-CTFT, 1990;
9. Gaveau, D. L.; Sloan, S.; Molidena, E.; Yaen, H.; Sheil, D.; Abram, N. K.; Ancrenaz, M.; Nasi, R.; Quinones, M.; Wielaard, N. Four decades of forest persistence, clearance and logging on Borneo. *PloS One* **2014**, *9*, e101654.
